# Supplementary material for: Hemihelices on molecular scale: extended metal atom chains with helical perversions in ligands
Source: Royal Society of Chemistry journal article supplement (doi:10.1039/c9nj04345d), 2019-01-01
Supplement: c9nj04345d1.pdf [file c9nj04345d1.pdf]

# **Supporting Information on Hemihelices in Molecular Scale: Extended Metal Atom Chains with Helical Perversions in Ligands**

Tsai-Jung Liu, Shie-Ming Peng, and Bih-Yaw Jin\*

*Department of Chemistry, National Taiwan University, Taipei 10617, Taiwan(R.O.C.)*

E-mail: [byjin@ntu.edu.tw](mailto:byjin@ntu.edu.tw)

# Supporting Information Available

## DFT Functional Comparison on the Full Geometry Optimization Calculations

In order to check our calculation results, besides the BP86 functional we used in the whole paper, we also do full geometry optimizations of  $\text{Mo}_2\text{MMo}_2(\text{tpda})_4(\text{NCS})_2$  (M=Ni, Fe, Mn) with B3LYP and OPBE functionals. The results are shown in Table S1. Compared to the experimental crystal data listed in Table 1, the BP86 functional gives the closest metal-metal bond lengths, and the OPBE mostly under estimates these bond distances. However, all of these calculations give similar results. Except for a little longer Mo–Mo bond in M=Mn with B3LYP functional, dimolybdenum bonds are roughly the same in two conformations, while the Mo–M bonds are longer in *meso*-conformations. Changing the central from Ni to Fe and Mn, the Mo–M lengths gradually grow, and the *meso*-conformations become more and more relatively stable at the same time, which is also consist with our previous assumption.

**Table S1: DFT Funtional Comparison on the  $\text{Mo}_2\text{MMo}_2(\text{tpda})_4(\text{NCS})_2$  Calculations**

| Central metal M<br>( <i>meso</i> /helical) | Functional | Mo–Mo<br>(Å) | Mo–M<br>(Å) | $E_m - E_h$<br>(eV) |
|--------------------------------------------|------------|--------------|-------------|---------------------|
| Ni (S=1)                                   | BP86       | 2.10/2.10    | 2.54/2.45   | -0.011              |
|                                            | B3LYP      | 2.07/2.07    | 2.56/2.47   | -0.0030             |
|                                            | OPBE       | 2.05/2.05    | 2.54/2.43   | 0.0012              |
| Fe (S=2)                                   | BP86       | 2.11/2.10    | 2.55/2.46   | -0.17               |
|                                            | B3LYP      | 2.07/2.07    | 2.58/2.49   | -0.0075             |
|                                            | OPBE       | 2.06/2.06    | 2.55/2.46   | -0.0053             |
| Mn (S=5/2)                                 | BP86       | 2.10/2.09    | 2.58/2.50   | -0.34               |
|                                            | B3LYP      | 2.06/2.12    | 2.60/2.47   | -0.058              |
|                                            | OPBE       | 2.05/2.04    | 2.60/2.51   | -0.013              |

# Atomic coordinates from EMACs Full Optimizations

All DFT optimizations are calculated with ORCA 3.0.3 and the BP86 exchange-correlation functional. The def2-SVP basis set and def2-SVP/J auxiliary basis set are used for H and C atoms. For NOS atom, def2-TZVP(-f) basis set and def2-TZVP/J auxiliary basis set are used. And as for transition metal atoms, def2-TZVPP basis set and def2-TZVPP/J auxiliary basis set is chosen. Additional ZORA approximation was applied on the 4d transition metal Mo.

**Table S2: Atomic coordinates of  $\text{Mo}_2\text{NiMo}_2(\text{tpda})_4(\text{NCS})_2$  (*meso* conformation)**

| atom | x       | y      | z       | atom | x      | y       | z       |
|------|---------|--------|---------|------|--------|---------|---------|
| Ni   | 0.0000  | 0.0000 | 0.0000  | H    | 1.6216 | -1.6754 | -6.7163 |
| Mo   | 0.0000  | 0.0000 | 4.6450  | H    | 3.3740 | -3.4726 | -6.7965 |
| Mo   | 0.0000  | 0.0000 | 2.5415  | H    | 4.1684 | -4.4757 | -4.5811 |
| Mo   | 0.0000  | 0.0000 | -4.6450 | H    | 3.0821 | -3.7134 | -2.4625 |
| Mo   | 0.0000  | 0.0000 | -2.5415 | H    | 0.8066 | -4.5436 | -2.1707 |
| N    | 0.0000  | 0.0000 | 6.8992  | N    | 1.9177 | 0.9139  | 0.0000  |
| C    | 0.0000  | 0.0000 | 8.1014  | C    | 4.7161 | 0.7697  | 0.0000  |
| S    | 0.0000  | 0.0000 | 9.7134  | H    | 5.8079 | 0.6250  | 0.0001  |
| N    | 0.0000  | 0.0000 | -6.8992 | N    | 1.7483 | 1.3636  | 4.6571  |
| C    | 0.0000  | 0.0000 | -8.1014 | N    | 1.8517 | 1.0652  | 2.3464  |
| S    | 0.0000  | 0.0000 | -9.7133 | C    | 2.1809 | 1.9595  | 5.8021  |
| N    | -0.9139 | 1.9176 | 0.0000  | C    | 3.1705 | 2.9361  | 5.8355  |
| C    | -0.7701 | 4.7161 | 0.0000  | C    | 3.7302 | 3.3585  | 4.6111  |
| H    | -0.6259 | 5.8080 | 0.0001  | C    | 3.3146 | 2.7522  | 3.4302  |
| N    | -1.3636 | 1.7483 | 4.6571  | C    | 2.3396 | 1.7136  | 3.4595  |
| N    | -1.0652 | 1.8517 | 2.3464  | C    | 2.6079 | 0.9699  | 1.1829  |
| C    | -1.9592 | 2.1811 | 5.8021  | C    | 4.0207 | 0.8598  | 1.2079  |
| C    | -2.9356 | 3.1709 | 5.8356  | H    | 1.6750 | 1.6220  | 6.7163  |
| C    | -3.3582 | 3.7305 | 4.6111  | H    | 3.4720 | 3.3746  | 6.7964  |
| C    | -2.7520 | 3.3148 | 3.4302  | H    | 4.4748 | 4.1693  | 4.5810  |
| C    | -1.7136 | 2.3396 | 3.4595  | H    | 3.7129 | 3.0826  | 2.4625  |
| C    | -0.9700 | 2.6079 | 1.1829  | H    | 4.5435 | 0.8060  | 2.1708  |
| C    | -0.8602 | 4.0207 | 1.2079  | N    | 1.7484 | 1.3634  | -4.6571 |
| H    | -1.6214 | 1.6756 | 6.7164  | N    | 1.8518 | 1.0651  | -2.3464 |

| atom | x       | y       | z       | atom | x       | y       | z       |
|------|---------|---------|---------|------|---------|---------|---------|
| H    | -3.3742 | 3.4723  | 6.7964  | C    | 2.1811  | 1.9592  | -5.8021 |
| H    | -4.1686 | 4.4755  | 4.5811  | C    | 3.1708  | 2.9357  | -5.8355 |
| H    | -3.0826 | 3.7129  | 2.4625  | C    | 3.7306  | 3.3581  | -4.6111 |
| H    | -0.8070 | 4.5436  | 2.1708  | C    | 3.3149  | 2.7519  | -3.4302 |
| N    | -1.3634 | 1.7484  | -4.6571 | C    | 2.3397  | 1.7134  | -3.4595 |
| N    | -1.0651 | 1.8517  | -2.3464 | C    | 2.6080  | 0.9698  | -1.1829 |
| C    | -1.9590 | 2.1814  | -5.8021 | C    | 4.0207  | 0.8597  | -1.2078 |
| C    | -2.9352 | 3.1713  | -5.8356 | H    | 1.6751  | 1.6219  | -6.7163 |
| C    | -3.3578 | 3.7309  | -4.6112 | H    | 3.4724  | 3.3742  | -6.7964 |
| C    | -2.7516 | 3.3152  | -3.4302 | H    | 4.4753  | 4.1688  | -4.5810 |
| C    | -1.7134 | 2.3398  | -3.4595 | H    | 3.7133  | 3.0822  | -2.4626 |
| C    | -0.9699 | 2.6079  | -1.1829 | H    | 4.5436  | 0.8059  | -2.1707 |
| C    | -0.8601 | 4.0207  | -1.2078 | N    | -1.9177 | -0.9139 | 0.0000  |
| H    | -1.6213 | 1.6757  | -6.7164 | C    | -4.7161 | -0.7699 | 0.0000  |
| H    | -3.3738 | 3.4727  | -6.7965 | H    | -5.8079 | -0.6253 | 0.0001  |
| H    | -4.1680 | 4.4760  | -4.5812 | N    | -1.7483 | -1.3637 | 4.6571  |
| H    | -3.0822 | 3.7133  | -2.4626 | N    | -1.8517 | -1.0652 | 2.3464  |
| H    | -0.8069 | 4.5436  | -2.1707 | C    | -2.1810 | -1.9595 | 5.8021  |
| N    | 0.9139  | -1.9177 | 0.0000  | C    | -3.1706 | -2.9360 | 5.8355  |
| C    | 0.7698  | -4.7161 | 0.0000  | C    | -3.7303 | -3.3585 | 4.6111  |
| H    | 0.6255  | -5.8080 | 0.0001  | C    | -3.3146 | -2.7522 | 3.4302  |
| N    | 1.3637  | -1.7483 | 4.6570  | C    | -2.3396 | -1.7136 | 3.4595  |
| N    | 1.0652  | -1.8517 | 2.3464  | C    | -2.6079 | -0.9699 | 1.1829  |
| C    | 1.9594  | -2.1810 | 5.8021  | C    | -4.0207 | -0.8600 | 1.2079  |
| C    | 2.9359  | -3.1707 | 5.8355  | H    | -1.6751 | -1.6220 | 6.7163  |
| C    | 3.3584  | -3.7304 | 4.6111  | H    | -3.4720 | -3.3746 | 6.7964  |
| C    | 2.7521  | -3.3148 | 3.4302  | H    | -4.4749 | -4.1692 | 4.5810  |
| C    | 1.7136  | -2.3396 | 3.4595  | H    | -3.7130 | -3.0826 | 2.4625  |
| C    | 0.9699  | -2.6080 | 1.1829  | H    | -4.5435 | -0.8063 | 2.1708  |
| C    | 0.8600  | -4.0208 | 1.2079  | N    | -1.7484 | -1.3635 | -4.6571 |
| H    | 1.6218  | -1.6753 | 6.7163  | N    | -1.8518 | -1.0651 | -2.3464 |
| H    | 3.3745  | -3.4721 | 6.7964  | C    | -2.1812 | -1.9592 | -5.8021 |
| H    | 4.1689  | -4.4752 | 4.5810  | C    | -3.1709 | -2.9357 | -5.8355 |
| H    | 3.0825  | -3.7130 | 2.4625  | C    | -3.7306 | -3.3581 | -4.6111 |
| H    | 0.8066  | -4.5436 | 2.1708  | C    | -3.3149 | -2.7519 | -3.4302 |
| N    | 1.3634  | -1.7484 | -4.6571 | C    | -2.3398 | -1.7134 | -3.4595 |
| N    | 1.0651  | -1.8518 | -2.3464 | C    | -2.6080 | -0.9699 | -1.1829 |
| C    | 1.9591  | -2.1812 | -5.8021 | C    | -4.0208 | -0.8599 | -1.2078 |
| C    | 2.9355  | -3.1711 | -5.8355 | H    | -1.6752 | -1.6218 | -6.7163 |
| C    | 3.3579  | -3.7308 | -4.6112 | H    | -3.4724 | -3.3742 | -6.7964 |
| C    | 2.7517  | -3.3151 | -3.4302 | H    | -4.4754 | -4.1687 | -4.5810 |
| C    | 1.7134  | -2.3398 | -3.4595 | H    | -3.7133 | -3.0822 | -2.4625 |
| C    | 0.9698  | -2.6080 | -1.1829 | H    | -4.5436 | -0.8062 | -2.1707 |
| C    | 0.8599  | -4.0208 | -1.2078 |      |         |         |         |

**Table S3: Atomic coordinates of  $\text{Mo}_2\text{NiMo}_2(\text{tpda})_4(\text{NCS})_2$   
(helical conformation)**

| atom | x       | y       | z       | atom | x       | y       | z       |
|------|---------|---------|---------|------|---------|---------|---------|
| Mo   | 0.0000  | 0.0000  | 2.4452  | H    | -3.9875 | -2.6367 | 2.2707  |
| Mo   | 0.0000  | 0.0000  | 4.5434  | C    | -2.5319 | -1.4012 | 3.3179  |
| Mo   | 0.0000  | 0.0000  | -2.4453 | C    | -2.7869 | -0.3735 | 1.1312  |
| Mo   | 0.0000  | 0.0000  | -4.5434 | C    | -4.2036 | -0.3095 | 1.1697  |
| Ni   | 0.0000  | 0.0000  | 0.0000  | H    | -4.7369 | -0.4912 | 2.1101  |
| N    | -0.0001 | 2.1045  | 0.0000  | N    | -1.1582 | -1.8998 | -4.5221 |
| C    | 0.0000  | 4.9001  | -0.0001 | N    | -0.7137 | -2.0157 | -2.2356 |
| H    | 0.0001  | 6.0018  | 0.0000  | C    | -1.7741 | -2.3612 | -5.6434 |
| N    | -1.1580 | 1.8999  | 4.5222  | H    | -1.5149 | -1.8228 | -6.5656 |
| N    | -0.7137 | 2.0157  | 2.2355  | C    | -2.6846 | -3.4141 | -5.6423 |
| C    | -1.7740 | 2.3613  | 5.6434  | H    | -3.1485 | -3.7355 | -6.5848 |
| H    | -1.5148 | 1.8229  | 6.5656  | C    | -3.0146 | -4.0064 | -4.4061 |
| C    | -2.6845 | 3.4141  | 5.6424  | H    | -3.7787 | -4.7970 | -4.3451 |
| H    | -3.1484 | 3.7356  | 6.5849  | C    | -2.3758 | -3.5653 | -3.2493 |
| C    | -3.0145 | 4.0065  | 4.4062  | H    | -2.6376 | -3.9867 | -2.2705 |
| H    | -3.7785 | 4.7971  | 4.3452  | C    | -1.4014 | -2.5319 | -3.3178 |
| C    | -2.3757 | 3.5654  | 3.2493  | C    | -0.3734 | -2.7869 | -1.1312 |
| H    | -2.6376 | 3.9868  | 2.2706  | C    | -0.3092 | -4.2035 | -1.1697 |
| C    | -1.4014 | 2.5319  | 3.3178  | H    | -0.4901 | -4.7369 | -2.1102 |
| C    | -0.3736 | 2.7870  | 1.1312  | N    | 1.1582  | 1.8997  | -4.5221 |
| C    | -0.3094 | 4.2036  | 1.1697  | N    | 0.7136  | 2.0157  | -2.2356 |
| H    | -0.4907 | 4.7369  | 2.1101  | C    | 1.7743  | 2.3610  | -5.6434 |
| N    | 0.0000  | -2.1044 | 0.0000  | H    | 1.5153  | 1.8224  | -6.5655 |
| C    | 0.0001  | -4.9000 | 0.0001  | C    | 2.6846  | 3.4140  | -5.6423 |
| H    | 0.0005  | -6.0018 | 0.0000  | H    | 3.1486  | 3.7354  | -6.5848 |
| N    | 1.1581  | -1.8998 | 4.5221  | C    | 3.0142  | 4.0067  | -4.4062 |
| N    | 0.7137  | -2.0156 | 2.2356  | H    | 3.7780  | 4.7976  | -4.3452 |
| C    | 1.7742  | -2.3610 | 5.6434  | C    | 2.3753  | 3.5657  | -3.2494 |
| H    | 1.5151  | -1.8225 | 6.5655  | H    | 2.6368  | 3.9874  | -2.2706 |
| C    | 2.6845  | -3.4141 | 5.6424  | C    | 1.4014  | 2.5319  | -3.3178 |
| H    | 3.1484  | -3.7355 | 6.5848  | C    | 0.3735  | 2.7869  | -1.1313 |
| C    | 3.0139  | -4.0069 | 4.4062  | C    | 0.3094  | 4.2035  | -1.1698 |
| H    | 3.7777  | -4.7978 | 4.3452  | H    | 0.4911  | 4.7369  | -2.1101 |
| C    | 2.3752  | -3.5659 | 3.2494  | N    | -1.8998 | 1.1581  | -4.5222 |
| H    | 2.6367  | -3.9875 | 2.2707  | N    | -2.0157 | 0.7135  | -2.2356 |

| atom | x       | y       | z       | atom | x       | y       | z       |
|------|---------|---------|---------|------|---------|---------|---------|
| C    | 1.4014  | -2.5318 | 3.3178  | C    | -2.3612 | 1.7741  | -5.6435 |
| C    | 0.3736  | -2.7869 | 1.1312  | H    | -1.8227 | 1.5150  | -6.5656 |
| C    | 0.3097  | -4.2035 | 1.1697  | C    | -3.4142 | 2.6844  | -5.6424 |
| H    | 0.4918  | -4.7369 | 2.1100  | H    | -3.7356 | 3.1483  | -6.5849 |
| N    | 2.1044  | 0.0001  | 0.0000  | C    | -4.0067 | 3.0141  | -4.4062 |
| C    | 4.9001  | 0.0001  | 0.0000  | H    | -4.7975 | 3.7780  | -4.3452 |
| H    | 6.0018  | 0.0002  | 0.0000  | C    | -3.5657 | 2.3753  | -3.2494 |
| N    | 1.8999  | 1.1580  | 4.5222  | H    | -3.9872 | 2.6370  | -2.2707 |
| N    | 2.0157  | 0.7136  | 2.2356  | C    | -2.5320 | 1.4013  | -3.3179 |
| C    | 2.3613  | 1.7740  | 5.6435  | C    | -2.7870 | 0.3733  | -1.1313 |
| H    | 1.8228  | 1.5149  | 6.5656  | C    | -4.2036 | 0.3091  | -1.1698 |
| C    | 3.4143  | 2.6843  | 5.6424  | H    | -4.7369 | 0.4902  | -2.1102 |
| H    | 3.7358  | 3.1482  | 6.5849  | N    | 1.8998  | -1.1581 | -4.5222 |
| C    | 4.0070  | 3.0139  | 4.4062  | N    | 2.0157  | -0.7135 | -2.2356 |
| H    | 4.7978  | 3.7778  | 4.3452  | C    | 2.3611  | -1.7741 | -5.6434 |
| C    | 3.5658  | 2.3751  | 3.2494  | H    | 1.8226  | -1.5151 | -6.5656 |
| H    | 3.9874  | 2.6368  | 2.2707  | C    | 3.4142  | -2.6844 | -5.6424 |
| C    | 2.5319  | 1.4013  | 3.3179  | H    | 3.7356  | -3.1483 | -6.5848 |
| C    | 2.7869  | 0.3735  | 1.1312  | C    | 4.0069  | -3.0140 | -4.4062 |
| C    | 4.2035  | 0.3094  | 1.1697  | H    | 4.7977  | -3.7778 | -4.3452 |
| H    | 4.7369  | 0.4909  | 2.1101  | C    | 3.5658  | -2.3752 | -3.2494 |
| N    | -2.1045 | 0.0000  | 0.0000  | H    | 3.9874  | -2.6368 | -2.2706 |
| C    | -4.9001 | -0.0002 | 0.0000  | C    | 2.5319  | -1.4013 | -3.3179 |
| H    | -6.0018 | -0.0004 | -0.0001 | C    | 2.7869  | -0.3733 | -1.1313 |
| N    | -1.8999 | -1.1579 | 4.5222  | C    | 4.2035  | -0.3092 | -1.1698 |
| N    | -2.0157 | -0.7135 | 2.2356  | H    | 4.7369  | -0.4904 | -2.1102 |
| C    | -2.3612 | -1.7740 | 5.6435  | N    | 0.0000  | 0.0000  | -6.8035 |
| H    | -1.8227 | -1.5149 | 6.5656  | C    | 0.0000  | 0.0000  | -8.0056 |
| C    | -3.4143 | -2.6843 | 5.6424  | S    | -0.0001 | 0.0000  | -9.6184 |
| H    | -3.7357 | -3.1482 | 6.5849  | N    | 0.0000  | 0.0000  | 6.8035  |
| C    | -4.0070 | -3.0138 | 4.4063  | C    | 0.0000  | 0.0000  | 8.0056  |
| H    | -4.7978 | -3.7777 | 4.3453  | S    | 0.0000  | 0.0001  | 9.6184  |
| C    | -3.5659 | -2.3751 | 3.2494  |      |         |         |         |

**Table S4: Atomic coordinates of  $\text{Mo}_2\text{MnMo}_2(\text{tpda})_4(\text{NCS})_2$   
(*meso* conformation)**

| atom | x       | y      | z       | atom | x      | y       | z       |
|------|---------|--------|---------|------|--------|---------|---------|
| Mn   | -0.0001 | 0.0000 | 0.0000  | H    | 1.5894 | -1.6950 | -6.7375 |
| Mo   | 0.0000  | 0.0000 | 4.6782  | H    | 3.3381 | -3.4964 | -6.8335 |
| Mo   | 0.0000  | 0.0000 | 2.5819  | H    | 4.1609 | -4.4894 | -4.6235 |
| Mo   | 0.0000  | 0.0000 | -4.6782 | H    | 3.1066 | -3.7136 | -2.4950 |
| Mo   | 0.0000  | 0.0000 | -2.5819 | H    | 0.8184 | -4.5616 | -2.1720 |
| N    | 0.0000  | 0.0000 | 6.9642  | N    | 1.9440 | 1.0212  | 0.0000  |
| C    | 0.0000  | 0.0000 | 8.1667  | C    | 4.7245 | 0.7999  | 0.0000  |
| S    | 0.0000  | 0.0000 | 9.7794  | H    | 5.8143 | 0.6400  | -0.0001 |
| N    | 0.0000  | 0.0000 | -6.9643 | N    | 1.7570 | 1.3608  | 4.6746  |
| C    | 0.0000  | 0.0000 | -8.1667 | N    | 1.8557 | 1.0917  | 2.3540  |
| S    | 0.0000  | 0.0000 | -9.7794 | C    | 2.1976 | 1.9393  | 5.8258  |
| N    | -1.0212 | 1.9441 | 0.0000  | C    | 3.1897 | 2.9129  | 5.8682  |
| C    | -0.7996 | 4.7246 | 0.0000  | C    | 3.7434 | 3.3511  | 4.6467  |
| H    | -0.6394 | 5.8144 | -0.0001 | C    | 3.3198 | 2.7624  | 3.4598  |
| N    | -1.3607 | 1.7571 | 4.6746  | C    | 2.3429 | 1.7246  | 3.4786  |
| N    | -1.0917 | 1.8558 | 2.3540  | C    | 2.6248 | 1.0274  | 1.1895  |
| C    | -1.9393 | 2.1975 | 5.8257  | C    | 4.0344 | 0.8919  | 1.2125  |
| C    | -2.9131 | 3.1895 | 5.8682  | H    | 1.6953 | 1.5890  | 6.7376  |
| C    | -3.3511 | 3.7433 | 4.6467  | H    | 3.4970 | 3.3374  | 6.8335  |
| C    | -2.7625 | 3.3197 | 3.4598  | H    | 4.4899 | 4.1603  | 4.6236  |
| C    | -1.7246 | 2.3429 | 3.4786  | H    | 3.7140 | 3.1062  | 2.4950  |
| C    | -1.0273 | 2.6249 | 1.1895  | H    | 4.5616 | 0.8186  | 2.1720  |
| C    | -0.8917 | 4.0344 | 1.2125  | N    | 1.7569 | 1.3610  | -4.6746 |
| H    | -1.5894 | 1.6950 | 6.7375  | N    | 1.8556 | 1.0918  | -2.3540 |
| H    | -3.3375 | 3.4969 | 6.8336  | C    | 2.1973 | 1.9396  | -5.8257 |
| H    | -4.1605 | 4.4897 | 4.6236  | C    | 3.1893 | 2.9133  | -5.8682 |
| H    | -3.1062 | 3.7141 | 2.4951  | C    | 3.7429 | 3.3515  | -4.6466 |
| H    | -0.8179 | 4.5617 | 2.1720  | C    | 3.3194 | 2.7628  | -3.4597 |
| N    | -1.3610 | 1.7570 | -4.6746 | C    | 2.3427 | 1.7248  | -3.4786 |
| N    | -1.0918 | 1.8557 | -2.3540 | C    | 2.6248 | 1.0274  | -1.1895 |
| C    | -1.9396 | 2.1973 | -5.8257 | C    | 4.0343 | 0.8920  | -1.2126 |
| C    | -2.9134 | 3.1892 | -5.8682 | H    | 1.6952 | 1.5892  | -6.7376 |
| C    | -3.3516 | 3.7429 | -4.6467 | H    | 3.4965 | 3.3379  | -6.8335 |
| C    | -2.7628 | 3.3194 | -3.4597 | H    | 4.4894 | 4.1608  | -4.6235 |
| C    | -1.7248 | 2.3428 | -3.4786 | H    | 3.7135 | 3.1067  | -2.4950 |

| atom | x       | y       | z       | atom | x       | y       | z       |
|------|---------|---------|---------|------|---------|---------|---------|
| C    | -1.0274 | 2.6249  | -1.1895 | H    | 4.5616  | 0.8187  | -2.1720 |
| C    | -0.8918 | 4.0344  | -1.2126 | N    | -1.9441 | -1.0212 | 0.0000  |
| H    | -1.5895 | 1.6949  | -6.7375 | C    | -4.7246 | -0.7998 | 0.0000  |
| H    | -3.3380 | 3.4965  | -6.8335 | H    | -5.8144 | -0.6399 | -0.0001 |
| H    | -4.1611 | 4.4892  | -4.6235 | N    | -1.7571 | -1.3607 | 4.6746  |
| H    | -3.1067 | 3.7137  | -2.4950 | N    | -1.8558 | -1.0916 | 2.3540  |
| H    | -0.8181 | 4.5616  | -2.1720 | C    | -2.1976 | -1.9393 | 5.8257  |
| N    | 1.0212  | -1.9441 | 0.0000  | C    | -3.1896 | -2.9129 | 5.8682  |
| C    | 0.7999  | -4.7246 | 0.0000  | C    | -3.7433 | -3.3511 | 4.6467  |
| H    | 0.6399  | -5.8144 | -0.0001 | C    | -3.3197 | -2.7625 | 3.4597  |
| N    | 1.3608  | -1.7570 | 4.6746  | C    | -2.3429 | -1.7246 | 3.4786  |
| N    | 1.0917  | -1.8557 | 2.3540  | C    | -2.6249 | -1.0274 | 1.1895  |
| C    | 1.9393  | -2.1975 | 5.8257  | C    | -4.0344 | -0.8919 | 1.2126  |
| C    | 2.9130  | -3.1895 | 5.8682  | H    | -1.6953 | -1.5890 | 6.7376  |
| C    | 3.3511  | -3.7433 | 4.6467  | H    | -3.4969 | -3.3374 | 6.8335  |
| C    | 2.7624  | -3.3198 | 3.4597  | H    | -4.4898 | -4.1604 | 4.6236  |
| C    | 1.7246  | -2.3429 | 3.4785  | H    | -3.7139 | -3.1063 | 2.4950  |
| C    | 1.0273  | -2.6249 | 1.1895  | H    | -4.5617 | -0.8185 | 2.1720  |
| C    | 0.8919  | -4.0344 | 1.2126  | N    | -1.7569 | -1.3610 | -4.6746 |
| H    | 1.5892  | -1.6951 | 6.7375  | N    | -1.8557 | -1.0917 | -2.3540 |
| H    | 3.3375  | -3.4968 | 6.8335  | C    | -2.1974 | -1.9396 | -5.8257 |
| H    | 4.1604  | -4.4898 | 4.6236  | C    | -3.1893 | -2.9133 | -5.8681 |
| H    | 3.1062  | -3.7140 | 2.4950  | C    | -3.7429 | -3.3516 | -4.6466 |
| H    | 0.8182  | -4.5617 | 2.1720  | C    | -3.3194 | -2.7628 | -3.4597 |
| N    | 1.3610  | -1.7569 | -4.6746 | C    | -2.3427 | -1.7248 | -3.4786 |
| N    | 1.0918  | -1.8557 | -2.3540 | C    | -2.6248 | -1.0274 | -1.1895 |
| C    | 1.9397  | -2.1972 | -5.8257 | C    | -4.0344 | -0.8920 | -1.2126 |
| C    | 2.9134  | -3.1892 | -5.8681 | H    | -1.6952 | -1.5892 | -6.7376 |
| C    | 3.3516  | -3.7429 | -4.6466 | H    | -3.4965 | -3.3380 | -6.8335 |
| C    | 2.7628  | -3.3194 | -3.4597 | H    | -4.4894 | -4.1609 | -4.6235 |
| C    | 1.7248  | -2.3427 | -3.4785 | H    | -3.7135 | -3.1067 | -2.4950 |
| C    | 1.0274  | -2.6248 | -1.1895 | H    | -4.5617 | -0.8186 | -2.1720 |
| C    | 0.8919  | -4.0344 | -1.2126 |      |         |         |         |



**Table S5: Atomic coordinates of  $\text{Mo}_2\text{MnMo}_2(\text{tpda})_4(\text{NCS})_2$  (helical conformation)**

| atom | x       | y       | z       | atom | x       | y       | z       |
|------|---------|---------|---------|------|---------|---------|---------|
| Mo   | -0.0003 | 0.0000  | 2.5039  | H    | -4.0690 | -2.5182 | 2.3153  |
| Mo   | -0.0003 | -0.0001 | 4.5962  | C    | -2.5907 | -1.3032 | 3.3553  |
| Mo   | -0.0004 | -0.0001 | -2.5040 | C    | -2.8510 | -0.3172 | 1.1535  |
| Mo   | -0.0003 | 0.0000  | -4.5963 | C    | -4.2668 | -0.2355 | 1.1921  |
| Mn   | -0.0004 | -0.0001 | -0.0001 | H    | -4.8065 | -0.3563 | 2.1387  |
| N    | -0.0003 | 2.1827  | -0.0001 | N    | -1.0716 | -1.9540 | -4.5599 |
| C    | 0.0022  | 4.9582  | 0.0005  | N    | -0.6281 | -2.0655 | -2.2646 |
| H    | 0.0036  | 6.0601  | 0.0008  | C    | -1.6671 | -2.4335 | -5.6846 |
| N    | -1.0721 | 1.9537  | 4.5597  | H    | -1.4178 | -1.8876 | -6.6056 |
| N    | -0.6286 | 2.0652  | 2.2644  | C    | -2.5508 | -3.5089 | -5.6888 |
| C    | -1.6677 | 2.4332  | 5.6844  | H    | -2.9998 | -3.8437 | -6.6337 |
| H    | -1.4186 | 1.8872  | 6.6054  | C    | -2.8767 | -4.1033 | -4.4528 |
| C    | -2.5511 | 3.5088  | 5.6885  | H    | -3.6242 | -4.9097 | -4.3939 |
| H    | -3.0001 | 3.8436  | 6.6334  | C    | -2.2561 | -3.6444 | -3.2931 |
| C    | -2.8764 | 4.1037  | 4.4526  | H    | -2.5173 | -4.0695 | -2.3160 |
| H    | -3.6236 | 4.9104  | 4.3937  | C    | -1.3020 | -2.5912 | -3.3557 |
| C    | -2.2559 | 3.6446  | 3.2930  | C    | -0.3162 | -2.8511 | -1.1537 |
| H    | -2.5167 | 4.0700  | 2.3158  | C    | -0.2336 | -4.2669 | -1.1921 |
| C    | -1.3024 | 2.5909  | 3.3555  | H    | -0.3533 | -4.8068 | -2.1387 |
| C    | -0.3164 | 2.8509  | 1.1536  | N    | 1.0713  | 1.9539  | -4.5599 |
| C    | -0.2335 | 4.2666  | 1.1924  | N    | 0.6280  | 2.0651  | -2.2646 |
| H    | -0.3531 | 4.8062  | 2.1391  | C    | 1.6674  | 2.4330  | -5.6844 |
| N    | 0.0004  | -2.1828 | -0.0002 | H    | 1.4180  | 1.8874  | -6.6056 |
| C    | 0.0018  | -4.9583 | 0.0000  | C    | 2.5511  | 3.5085  | -5.6884 |
| H    | 0.0028  | -6.0602 | -0.0001 | H    | 3.0003  | 3.8432  | -6.6332 |
| N    | 1.0718  | -1.9537 | 4.5597  | C    | 2.8762  | 4.1034  | -4.4525 |
| N    | 0.6285  | -2.0650 | 2.2644  | H    | 3.6236  | 4.9099  | -4.3934 |
| C    | 1.6677  | -2.4329 | 5.6844  | C    | 2.2555  | 3.6444  | -3.2929 |
| H    | 1.4183  | -1.8872 | 6.6055  | H    | 2.5163  | 4.0697  | -2.3157 |
| C    | 2.5514  | -3.5083 | 5.6884  | C    | 1.3021  | 2.5905  | -3.3556 |
| H    | 3.0005  | -3.8431 | 6.6333  | C    | 0.3169  | 2.8508  | -1.1536 |
| C    | 2.8768  | -4.1031 | 4.4525  | C    | 0.2368  | 4.2667  | -1.1917 |
| H    | 3.6240  | -4.9098 | 4.3935  | H    | 0.3587  | 4.8067  | -2.1379 |
| C    | 2.2561  | -3.6441 | 3.2928  | N    | -1.9539 | 1.0722  | -4.5596 |
| H    | 2.5168  | -4.0696 | 2.3157  | N    | -2.0654 | 0.6286  | -2.2644 |

| atom | x       | y       | z       | atom | x       | y       | z       |
|------|---------|---------|---------|------|---------|---------|---------|
| C    | 1.3025  | -2.5905 | 3.3555  | C    | -2.4332 | 1.6681  | -5.6842 |
| C    | 0.3171  | -2.8508 | 1.1535  | H    | -1.8876 | 1.4186  | -6.6053 |
| C    | 0.2365  | -4.2666 | 1.1920  | C    | -3.5080 | 2.5524  | -5.6881 |
| H    | 0.3579  | -4.8064 | 2.1384  | H    | -3.8428 | 3.0017  | -6.6329 |
| N    | 2.1823  | 0.0003  | -0.0001 | C    | -4.1023 | 2.8784  | -4.4520 |
| C    | 4.9578  | -0.0003 | 0.0002  | H    | -4.9085 | 3.6261  | -4.3929 |
| H    | 6.0597  | -0.0006 | 0.0003  | C    | -3.6436 | 2.2573  | -3.2925 |
| N    | 1.9530  | 1.0727  | 4.5594  | H    | -4.0687 | 2.5183  | -2.3152 |
| N    | 2.0646  | 0.6291  | 2.2642  | C    | -2.5908 | 1.3028  | -3.3553 |
| C    | 2.4324  | 1.6683  | 5.6841  | C    | -2.8512 | 0.3169  | -1.1535 |
| H    | 1.8868  | 1.4187  | 6.6053  | C    | -4.2670 | 0.2358  | -1.1917 |
| C    | 3.5072  | 2.5527  | 5.6881  | H    | -4.8070 | 0.3569  | -2.1381 |
| H    | 3.8420  | 3.0018  | 6.6330  | N    | 1.9533  | -1.0723 | -4.5596 |
| C    | 4.1013  | 2.8789  | 4.4520  | N    | 2.0648  | -0.6287 | -2.2644 |
| H    | 4.9077  | 3.6264  | 4.3931  | C    | 2.4326  | -1.6680 | -5.6843 |
| C    | 3.6426  | 2.2580  | 3.2924  | H    | 1.8871  | -1.4184 | -6.6054 |
| H    | 4.0678  | 2.5189  | 2.3152  | C    | 3.5074  | -2.5525 | -5.6882 |
| C    | 2.5901  | 1.3031  | 3.3553  | H    | 3.8422  | -3.0016 | -6.6330 |
| C    | 2.8504  | 0.3171  | 1.1535  | C    | 4.1014  | -2.8787 | -4.4521 |
| C    | 4.2662  | 0.2354  | 1.1921  | H    | 4.9076  | -3.6264 | -4.3930 |
| H    | 4.8059  | 0.3560  | 2.1386  | C    | 3.6427  | -2.2577 | -3.2925 |
| N    | -2.1829 | -0.0004 | -0.0001 | H    | 4.0677  | -2.5188 | -2.3153 |
| C    | -4.9584 | 0.0003  | 0.0003  | C    | 2.5902  | -1.3029 | -3.3554 |
| H    | -6.0603 | 0.0006  | 0.0004  | C    | 2.8505  | -0.3169 | -1.1535 |
| N    | -1.9537 | -1.0727 | 4.5595  | C    | 4.2663  | -0.2358 | -1.1918 |
| N    | -2.0652 | -0.6292 | 2.2642  | H    | 4.8063  | -0.3568 | -2.1382 |
| C    | -2.4330 | -1.6686 | 5.6841  | N    | -0.0003 | 0.0001  | -6.8880 |
| H    | -1.8873 | -1.4191 | 6.6052  | C    | -0.0004 | 0.0001  | -8.0904 |
| C    | -3.5080 | -2.5527 | 5.6880  | S    | -0.0004 | 0.0001  | -9.7038 |
| H    | -3.8429 | -3.0018 | 6.6329  | N    | -0.0004 | -0.0001 | 6.8879  |
| C    | -4.1025 | -2.8784 | 4.4520  | C    | -0.0004 | -0.0001 | 8.0903  |
| H    | -4.9090 | -3.6258 | 4.3930  | S    | -0.0005 | 0.0000  | 9.7037  |
| C    | -3.6437 | -2.2575 | 3.2924  |      |         |         |         |

**Table S6: Atomic coordinates of  $\text{Mo}_2\text{FeMo}_2(\text{tpda})_4(\text{NCS})_2$   
(*meso* conformation)**

| atom | x       | y      | z       | atom | x      | y       | z       |
|------|---------|--------|---------|------|--------|---------|---------|
| Fe   | 0.0000  | 0.0000 | 0.0000  | H    | 1.6093 | -1.6736 | -6.7237 |
| Mo   | 0.0000  | 0.0000 | 4.6547  | H    | 3.3627 | -3.4707 | -6.8169 |
| Mo   | 0.0000  | 0.0000 | 2.5479  | H    | 4.1672 | -4.4785 | -4.6072 |
| Mo   | 0.0000  | 0.0000 | -4.6547 | H    | 3.0923 | -3.7205 | -2.4824 |
| Mo   | 0.0000  | 0.0000 | -2.5479 | H    | 0.8192 | -4.5637 | -2.1715 |
| N    | 0.0000  | 0.0000 | 6.9335  | N    | 1.9387 | 0.9737  | 0.0000  |
| C    | 0.0000  | 0.0000 | 8.1358  | C    | 4.7258 | 0.7832  | 0.0000  |
| S    | 0.0000  | 0.0000 | 9.7487  | H    | 5.8164 | 0.6286  | 0.0000  |
| N    | 0.0000  | 0.0000 | -6.9335 | N    | 1.7513 | 1.3629  | 4.6639  |
| C    | 0.0000  | 0.0000 | -8.1358 | N    | 1.8582 | 1.0788  | 2.3492  |
| S    | 0.0000  | 0.0000 | -9.7487 | C    | 2.1858 | 1.9486  | 5.8136  |
| N    | -0.9630 | 1.9394 | 0.0000  | C    | 3.1790 | 2.9213  | 5.8548  |
| C    | -0.7925 | 4.7295 | 0.0000  | C    | 3.7403 | 3.3505  | 4.6337  |
| H    | -0.6444 | 5.8210 | 0.0000  | C    | 3.3226 | 2.7547  | 3.4481  |
| N    | -1.3617 | 1.7522 | 4.6636  | C    | 2.3440 | 1.7188  | 3.4689  |
| N    | -1.0747 | 1.8614 | 2.3493  | C    | 2.6232 | 1.0008  | 1.1869  |
| C    | -1.9520 | 2.1821 | 5.8126  | C    | 4.0341 | 0.8750  | 1.2110  |
| C    | -2.9284 | 3.1716 | 5.8533  | H    | 1.6783 | 1.6052  | 6.7249  |
| C    | -3.3563 | 3.7338 | 4.6321  | H    | 3.4814 | 3.3519  | 6.8189  |
| C    | -2.7559 | 3.3204 | 3.4473  | H    | 4.4884 | 4.1583  | 4.6096  |
| C    | -1.7165 | 2.3456 | 3.4690  | H    | 3.7224 | 3.0916  | 2.4833  |
| C    | -0.9977 | 2.6257 | 1.1875  | H    | 4.5598 | 0.8084  | 2.1717  |
| C    | -0.8810 | 4.0373 | 1.2109  | N    | 1.7512 | 1.3631  | -4.6639 |
| H    | -1.6093 | 1.6736 | 6.7237  | N    | 1.8582 | 1.0788  | -2.3492 |
| H    | -3.3623 | 3.4710 | 6.8169  | C    | 2.1856 | 1.9488  | -5.8136 |
| H    | -4.1670 | 4.4788 | 4.6072  | C    | 3.1788 | 2.9215  | -5.8548 |
| H    | -3.0920 | 3.7209 | 2.4825  | C    | 3.7400 | 3.3508  | -4.6336 |
| H    | -0.8192 | 4.5638 | 2.1714  | C    | 3.3224 | 2.7549  | -3.4481 |
| N    | -1.3619 | 1.7521 | -4.6636 | C    | 2.3439 | 1.7189  | -3.4689 |
| N    | -1.0748 | 1.8613 | -2.3493 | C    | 2.6232 | 1.0009  | -1.1869 |
| C    | -1.9521 | 2.1819 | -5.8126 | C    | 4.0341 | 0.8750  | -1.2110 |
| C    | -2.9287 | 3.1714 | -5.8533 | H    | 1.6782 | 1.6053  | -6.7249 |
| C    | -3.3566 | 3.7335 | -4.6321 | H    | 3.4812 | 3.3522  | -6.8189 |
| C    | -2.7561 | 3.3202 | -3.4473 | H    | 4.4881 | 4.1587  | -4.6096 |
| C    | -1.7166 | 2.3455 | -3.4690 | H    | 3.7222 | 3.0919  | -2.4833 |

| atom | x       | y       | z       | atom | x       | y       | z       |
|------|---------|---------|---------|------|---------|---------|---------|
| C    | -0.9977 | 2.6256  | -1.1876 | H    | 4.5597  | 0.8085  | -2.1718 |
| C    | -0.8810 | 4.0373  | -1.2109 | N    | -1.9387 | -0.9737 | 0.0000  |
| H    | -1.6094 | 1.6736  | -6.7237 | C    | -4.7258 | -0.7833 | 0.0000  |
| H    | -3.3626 | 3.4708  | -6.8169 | H    | -5.8164 | -0.6287 | 0.0000  |
| H    | -4.1673 | 4.4785  | -4.6072 | N    | -1.7513 | -1.3629 | 4.6639  |
| H    | -3.0923 | 3.7206  | -2.4824 | N    | -1.8582 | -1.0788 | 2.3492  |
| H    | -0.8193 | 4.5637  | -2.1715 | C    | -2.1857 | -1.9486 | 5.8136  |
| N    | 0.9629  | -1.9394 | 0.0000  | C    | -3.1790 | -2.9213 | 5.8548  |
| C    | 0.7924  | -4.7295 | 0.0000  | C    | -3.7403 | -3.3506 | 4.6336  |
| H    | 0.6444  | -5.8210 | 0.0000  | C    | -3.3226 | -2.7547 | 3.4481  |
| N    | 1.3618  | -1.7521 | 4.6636  | C    | -2.3440 | -1.7188 | 3.4689  |
| N    | 1.0747  | -1.8614 | 2.3493  | C    | -2.6232 | -1.0008 | 1.1869  |
| C    | 1.9520  | -2.1820 | 5.8126  | C    | -4.0341 | -0.8750 | 1.2110  |
| C    | 2.9284  | -3.1716 | 5.8533  | H    | -1.6782 | -1.6053 | 6.7249  |
| C    | 3.3563  | -3.7338 | 4.6321  | H    | -3.4814 | -3.3519 | 6.8189  |
| C    | 2.7559  | -3.3204 | 3.4473  | H    | -4.4883 | -4.1584 | 4.6096  |
| C    | 1.7165  | -2.3456 | 3.4690  | H    | -3.7224 | -3.0916 | 2.4833  |
| C    | 0.9976  | -2.6257 | 1.1875  | H    | -4.5598 | -0.8085 | 2.1717  |
| C    | 0.8809  | -4.0373 | 1.2109  | N    | -1.7512 | -1.3631 | -4.6639 |
| H    | 1.6092  | -1.6737 | 6.7237  | N    | -1.8582 | -1.0788 | -2.3492 |
| H    | 3.3624  | -3.4710 | 6.8169  | C    | -2.1856 | -1.9488 | -5.8135 |
| H    | 4.1669  | -4.4788 | 4.6072  | C    | -3.1788 | -2.9215 | -5.8547 |
| H    | 3.0920  | -3.7208 | 2.4824  | C    | -3.7400 | -3.3509 | -4.6336 |
| H    | 0.8191  | -4.5638 | 2.1714  | C    | -3.3224 | -2.7549 | -3.4481 |
| N    | 1.3619  | -1.7520 | -4.6636 | C    | -2.3439 | -1.7189 | -3.4689 |
| N    | 1.0748  | -1.8613 | -2.3493 | C    | -2.6232 | -1.0009 | -1.1869 |
| C    | 1.9522  | -2.1819 | -5.8126 | C    | -4.0341 | -0.8751 | -1.2110 |
| C    | 2.9287  | -3.1714 | -5.8532 | H    | -1.6782 | -1.6053 | -6.7249 |
| C    | 3.3567  | -3.7335 | -4.6321 | H    | -3.4811 | -3.3522 | -6.8189 |
| C    | 2.7561  | -3.3202 | -3.4472 | H    | -4.4881 | -4.1587 | -4.6095 |
| C    | 1.7167  | -2.3455 | -3.4690 | H    | -3.7221 | -3.0919 | -2.4833 |
| C    | 0.9977  | -2.6256 | -1.1876 | H    | -4.5597 | -0.8085 | -2.1718 |
| C    | 0.8810  | -4.0373 | -1.2109 |      |         |         |         |

**Table S7: Atomic coordinates of  $\text{Mo}_2\text{FeMo}_2(\text{tpda})_4(\text{NCS})_2$   
(helical conformation)**

| atom | x       | y       | z       | atom | x       | y       | z       |
|------|---------|---------|---------|------|---------|---------|---------|
| Mo   | 0.0000  | 0.0000  | 2.4588  | H    | -4.0393 | -2.5714 | 2.3022  |
| Mo   | 0.0000  | 0.0000  | 4.5619  | C    | -2.5667 | -1.3482 | 3.3415  |
| Mo   | 0.0000  | 0.0000  | -2.4587 | C    | -2.8285 | -0.3426 | 1.1490  |
| Mo   | 0.0000  | 0.0000  | -4.5618 | C    | -4.2451 | -0.2742 | 1.1839  |
| Fe   | 0.0000  | 0.0000  | 0.0000  | H    | -4.7838 | -0.4275 | 2.1263  |
| N    | -0.0032 | 2.1515  | -0.0058 | N    | -1.1162 | -1.9251 | -4.5426 |
| C    | 0.0011  | 4.9371  | -0.0014 | N    | -0.6649 | -2.0501 | -2.2558 |
| H    | 0.0029  | 6.0390  | 0.0003  | C    | -1.7284 | -2.3865 | -5.6659 |
| N    | -1.1198 | 1.9250  | 4.5332  | H    | -1.4765 | -1.8391 | -6.5851 |
| N    | -0.6705 | 2.0442  | 2.2436  | C    | -2.6271 | -3.4494 | -5.6703 |
| C    | -1.7274 | 2.3925  | 5.6563  | H    | -3.0884 | -3.7709 | -6.6140 |
| H    | -1.4733 | 1.8492  | 6.5773  | C    | -2.9487 | -4.0513 | -4.4367 |
| C    | -2.6259 | 3.4557  | 5.6582  | H    | -3.7046 | -4.8500 | -4.3785 |
| H    | -3.0842 | 3.7819  | 6.6017  | C    | -2.3130 | -3.6101 | -3.2784 |
| C    | -2.9525 | 4.0507  | 4.4226  | H    | -2.5709 | -4.0398 | -2.3023 |
| H    | -3.7091 | 4.8485  | 4.3628  | C    | -1.3482 | -2.5666 | -3.3414 |
| C    | -2.3205 | 3.6034  | 3.2644  | C    | -0.3428 | -2.8285 | -1.1490 |
| H    | -2.5809 | 4.0282  | 2.2867  | C    | -0.2747 | -4.2451 | -1.1839 |
| C    | -1.3553 | 2.5610  | 3.3298  | H    | -0.4285 | -4.7837 | -2.1262 |
| C    | -0.3462 | 2.8264  | 1.1385  | N    | 1.1162  | 1.9251  | -4.5426 |
| C    | -0.2742 | 4.2422  | 1.1792  | N    | 0.6649  | 2.0501  | -2.2558 |
| H    | -0.4266 | 4.7779  | 2.1235  | C    | 1.7284  | 2.3865  | -5.6659 |
| N    | 0.0031  | -2.1515 | -0.0058 | H    | 1.4764  | 1.8391  | -6.5851 |
| C    | -0.0015 | -4.9371 | -0.0014 | C    | 2.6272  | 3.4492  | -5.6703 |
| H    | -0.0034 | -6.0390 | 0.0003  | H    | 3.0886  | 3.7707  | -6.6140 |
| N    | 1.1197  | -1.9250 | 4.5332  | C    | 2.9491  | 4.0510  | -4.4367 |
| N    | 0.6705  | -2.0442 | 2.2436  | H    | 3.7052  | 4.8495  | -4.3785 |
| C    | 1.7272  | -2.3926 | 5.6563  | C    | 2.3133  | 3.6099  | -3.2783 |
| H    | 1.4729  | -1.8493 | 6.5774  | H    | 2.5714  | 4.0394  | -2.3022 |
| C    | 2.6260  | -3.4556 | 5.6582  | C    | 1.3483  | 2.5666  | -3.3414 |
| H    | 3.0842  | -3.7818 | 6.6018  | C    | 0.3429  | 2.8285  | -1.1489 |
| C    | 2.9530  | -4.0502 | 4.4226  | C    | 0.2745  | 4.2451  | -1.1838 |
| H    | 3.7098  | -4.8479 | 4.3629  | H    | 0.4283  | 4.7838  | -2.1261 |
| C    | 2.3210  | -3.6030 | 3.2643  | N    | -1.9250 | 1.1197  | -4.5332 |
| H    | 2.5816  | -4.0276 | 2.2867  | N    | -2.0441 | 0.6706  | -2.2435 |

| atom | x       | y       | z       | atom | x       | y       | z       |
|------|---------|---------|---------|------|---------|---------|---------|
| C    | 1.3553  | -2.5610 | 3.3298  | C    | -2.3927 | 1.7272  | -5.6563 |
| C    | 0.3463  | -2.8265 | 1.1385  | H    | -1.8494 | 1.4729  | -6.5774 |
| C    | 0.2740  | -4.2422 | 1.1792  | C    | -3.4559 | 2.6257  | -5.6582 |
| H    | 0.4263  | -4.7780 | 2.1234  | H    | -3.7821 | 3.0839  | -6.6018 |
| N    | 2.1515  | -0.0034 | 0.0059  | C    | -4.0507 | 2.9525  | -4.4227 |
| C    | 4.9371  | 0.0010  | 0.0014  | H    | -4.8486 | 3.7091  | -4.3630 |
| H    | 6.0390  | 0.0026  | -0.0003 | C    | -3.6034 | 2.3206  | -3.2644 |
| N    | 1.9251  | 1.1162  | 4.5427  | H    | -4.0281 | 2.5811  | -2.2868 |
| N    | 2.0502  | 0.6647  | 2.2559  | C    | -2.5611 | 1.3553  | -3.3298 |
| C    | 2.3865  | 1.7282  | 5.6660  | C    | -2.8264 | 0.3465  | -1.1384 |
| H    | 1.8393  | 1.4762  | 6.5852  | C    | -4.2421 | 0.2744  | -1.1792 |
| C    | 3.4492  | 2.6272  | 5.6703  | H    | -4.7779 | 0.4270  | -2.1234 |
| H    | 3.7708  | 3.0885  | 6.6140  | N    | 1.9249  | -1.1196 | -4.5332 |
| C    | 4.0508  | 2.9492  | 4.4366  | N    | 2.0441  | -0.6706 | -2.2436 |
| H    | 4.8493  | 3.7053  | 4.3784  | C    | 2.3926  | -1.7270 | -5.6564 |
| C    | 3.6097  | 2.3134  | 3.2783  | H    | 1.8494  | -1.4727 | -6.5774 |
| H    | 4.0392  | 2.5714  | 2.3022  | C    | 3.4558  | -2.6256 | -5.6583 |
| C    | 2.5667  | 1.3481  | 3.3415  | H    | 3.7821  | -3.0837 | -6.6020 |
| C    | 2.8285  | 0.3425  | 1.1490  | C    | 4.0505  | -2.9525 | -4.4228 |
| C    | 4.2451  | 0.2741  | 1.1839  | H    | 4.8483  | -3.7092 | -4.3631 |
| H    | 4.7838  | 0.4273  | 2.1263  | C    | 3.6032  | -2.3207 | -3.2645 |
| N    | -2.1515 | 0.0034  | 0.0059  | H    | 4.0279  | -2.5812 | -2.2869 |
| C    | -4.9371 | -0.0010 | 0.0014  | C    | 2.5610  | -1.3552 | -3.3298 |
| H    | -6.0390 | -0.0026 | -0.0003 | C    | 2.8264  | -0.3464 | -1.1384 |
| N    | -1.9252 | -1.1162 | 4.5427  | C    | 4.2421  | -0.2743 | -1.1792 |
| N    | -2.0502 | -0.6647 | 2.2558  | H    | 4.7779  | -0.4268 | -2.1234 |
| C    | -2.3865 | -1.7283 | 5.6660  | N    | -0.0001 | 0.0000  | -6.8442 |
| H    | -1.8392 | -1.4764 | 6.5852  | C    | -0.0001 | 0.0000  | -8.0465 |
| C    | -3.4492 | -2.6273 | 5.6703  | S    | -0.0001 | 0.0000  | -9.6601 |
| H    | -3.7708 | -3.0886 | 6.6140  | N    | 0.0000  | 0.0000  | 6.8442  |
| C    | -4.0509 | -2.9492 | 4.4366  | C    | 0.0000  | 0.0000  | 8.0465  |
| H    | -4.8494 | -3.7053 | 4.3784  | S    | -0.0001 | 0.0001  | 9.6601  |
| C    | -3.6098 | -2.3134 | 3.2783  |      |         |         |         |
